# Supplementary material for: Green and efficient biosynthesis of indigo from indole by engineered myoglobins
Source: Royal Society of Chemistry journal article supplement (doi:10.1039/c8ra07825d), 2018-01-01
Supplement: c8ra07825d1.pdf [file c8ra07825d1.pdf]

### Supplementary Information

## Green and efficient biosynthesis of indigo from indole by engineered myoglobins

Can Liu, Jiakun Xu, Shu-Qin Gao, Bo He, Chuan-Wan Wei\*, Xiao-Juan Wang, Zhonghua Wang, and Ying-Wu Lin\*

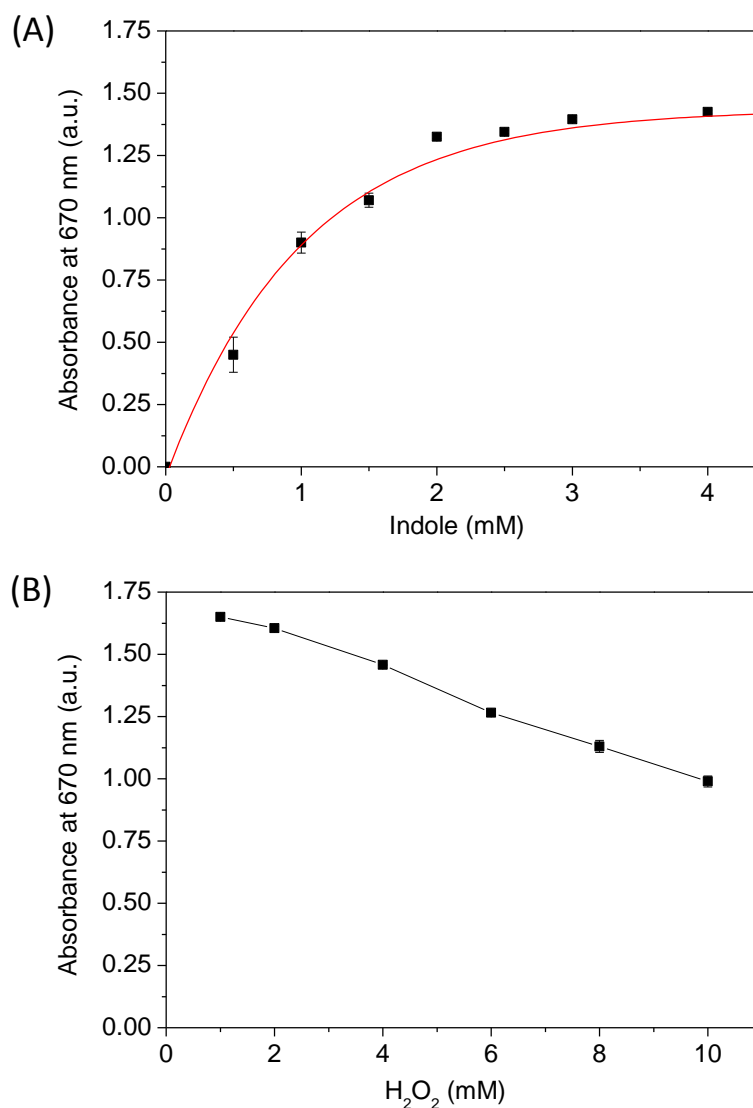

**Fig. S1** Absorbance at 670 nm upon oxidation of (A) indole (0.5-4 mM) by addition of the same equivalent of H<sub>2</sub>O<sub>2</sub> (0.5-4 mM), and (B) indole (4 mM) by addition of different amounts of H<sub>2</sub>O<sub>2</sub> (1-10 mM), respectively, catalyzed by F43Y Mb (10 μM) for 15 min at 37 °C.

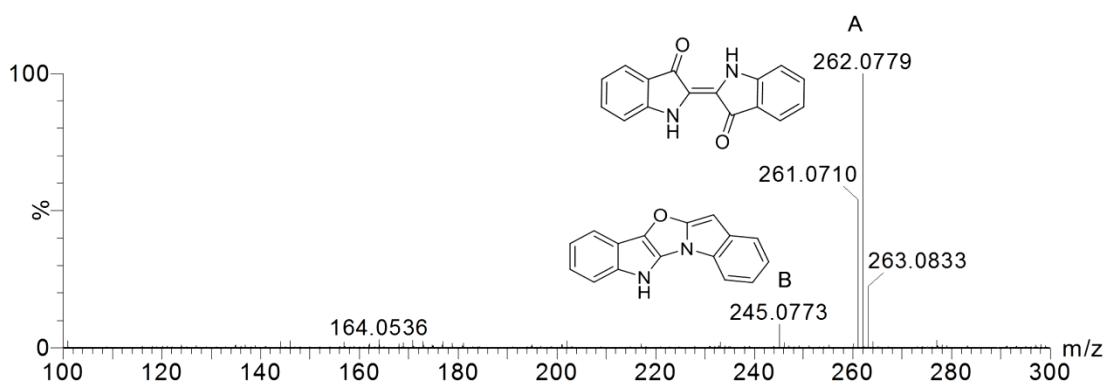

**Fig. S2** ESI-MS spectra of the oxidation product of indole in precipitation catalyzed by F43Y Mb. (A) Indigo ( $C_{16}H_{10}N_2O_2$ ), Calculated: 262.1 Da; Observed: 261.07 Da ( $[M-H]^-$ ), and the side product (B) 6H-oxazolo[3,2-a:4,5-b']diindole ( $C_{16}H_{10}N_2O$ ), Calculated: 246.1 Da; Observed: 245.07 Da ( $[M-H]^-$ ).

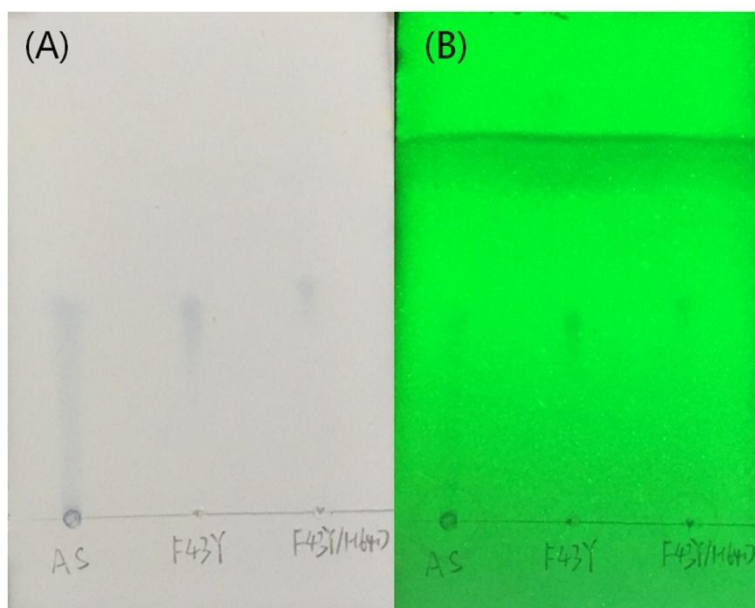

**Fig. S3** TLC analysis of the precipitates after centrifugation. As: Authentic sample of Indigo. The photo was taken directly after the expansion (A), and under the UV illumination ( $\lambda = 254$  nm) (B).

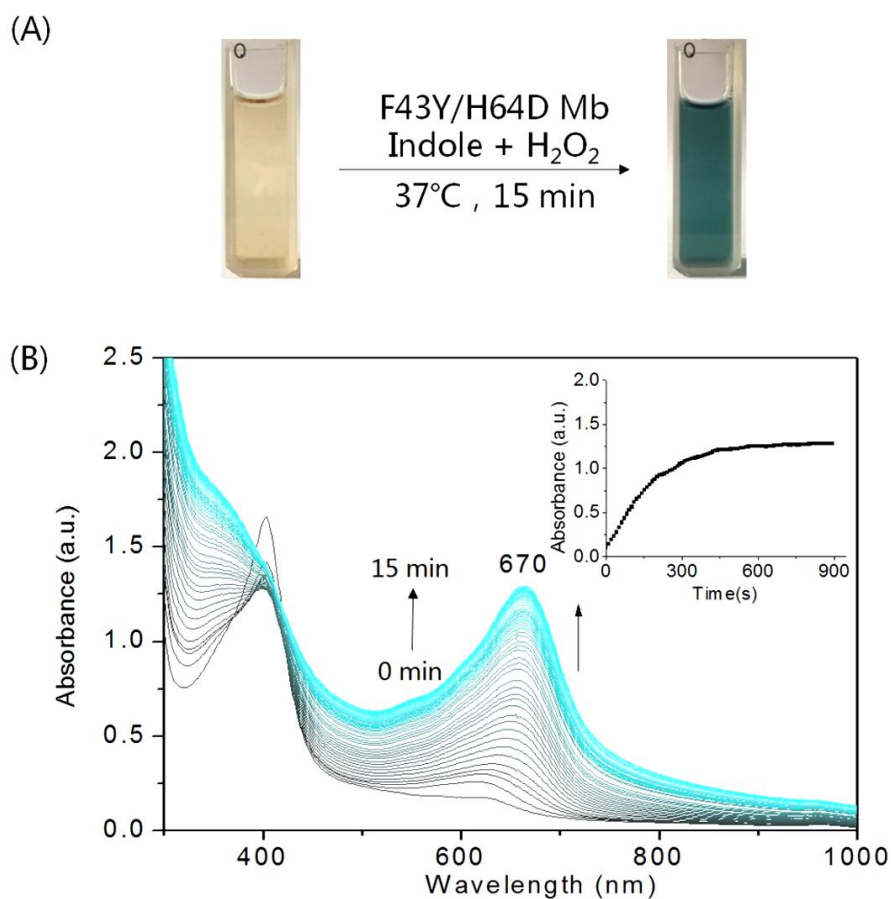

**Fig. S4** (A) Color changes of the oxidation of indole (1 mM) catalyzed by F43Y/H64D Mb (20  $\mu$ M) with H<sub>2</sub>O<sub>2</sub> (1 mM) as an oxidant. (B) UV-visible spectral changes of the oxidation of indole catalyzed by F43Y/H64D Mb. The change of the absorbance at 670 nm was shown as an inset.

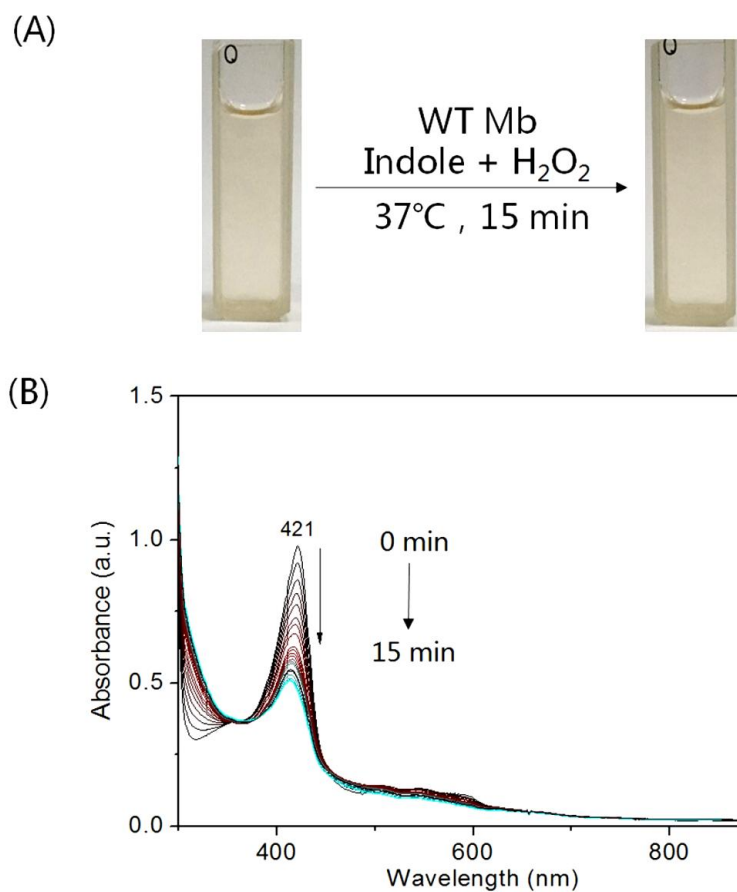

**Fig. S5** (A) Color changes of the oxidation of indole (1 mM) catalyzed by F43Y Mb (20  $\mu$ M) with H<sub>2</sub>O<sub>2</sub> (1 mM) as an oxidant. (B) UV-visible spectral changes of the oxidation of indole catalyzed by WT Mb.

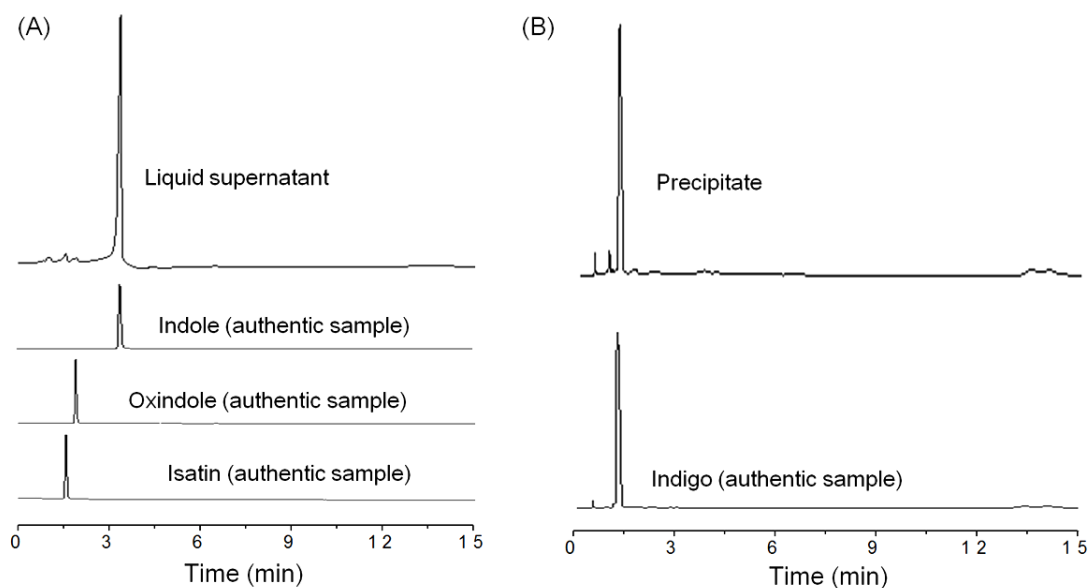

**Fig. S6** HPLC analysis of (A) the components extracted from the liquid supernatant of reaction mixture and monitored at 280 nm, and (B) the precipitate monitored at 250 nm catalyzed by F43Y/H64D Mb. HPLC traces of authentic samples of oxindole, isatin and indigo were shown for comparison.

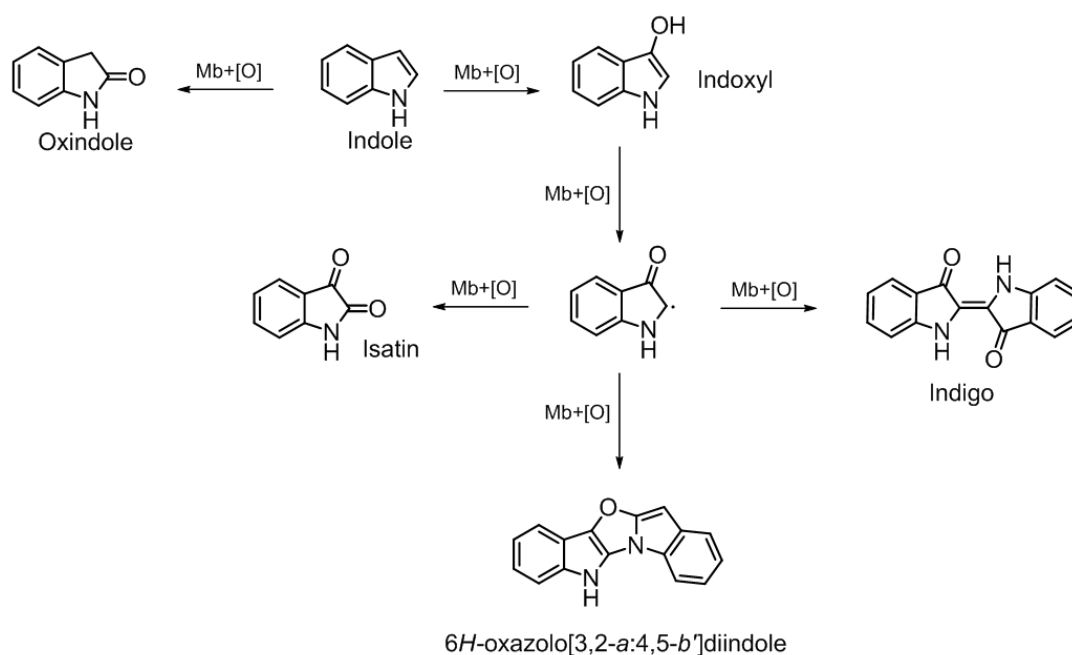

**Scheme S1.** Proposed reaction mechanism for indigo formation from indole catalyzed by Mb mutants (Xu *et al.*, *Catal. Sci. Technol.*, **2012**, 2: 739-744).
